# Supplementary material
Source: Elsevier journal article supplement (https://www.sciencedirect.com/science/article/pii/S0211699520301879)
Supplement: mmc1 [file S0211699520301879:mmc1.xlsx]

## Sheet: Hoja1
UNIVERSIDAD	ESTUDIANTES POR CCAA	HABITANTES POR CCAA	RATIO HABITANTES/ESTUDIANTES	MEDICOS/100.000 HABITANTES	ESTUDIANTES/100.000 HABITANTES	RATIO ESTUDIANTES/100 MEDICOS
ANDALUCIA	988	8460261	8563.02	386.42	11.6781	3.02213
ARAGON	224	1328753	5931.93	552.5	16.8579	3.05121
ASTURIAS	153	1018706	6658.21	492.07	15.0191	3.05222
BALEARES	60	1018706	16978.4	436.25	5.88982	1.3501
CANARIAS	265	2174474	8205.56	435.12	12.1869	2.8008
CANTABRIA	119	582796	4897.45	508.45	20.4188	4.01589
CASTILLA LA MANCHA	200	2044408	10222	366.54	9.78278	2.66895
CASTILLA-LEON	360	2393285	6648.01	490.45	15.0421	3.067
CATALUÑA	1134	7778362	6859.23	483.4	14.5789	3.01591
EXTREMADURA	120	1063575	8863.12	455.46	11.2827	2.47721
GALICIA	360	2700269	7500.75	436.77	13.332	3.05241
MADRID	1478	6778382	4586.19	594.22	21.8046	3.66945
MURCIA	290	1510951	5210.18	433.36	19.1932	4.42893
NAVARRA, COMUNIDAD FORAL	260	660887	2541.87	543.72	39.3411	7.23554
PAIS VASCO	330	2219777	6726.6	541	14.8664	2.74794
VALENCIANA, COMUNIDAD	770	5054796	6564.67	430.88	15.2331	3.53534
LA RIOJA	0	319653	0	443	0	0
TOTAL	7111	47108041
