# Supplementary material
Source: Elsevier journal article supplement (https://www.sciencedirect.com/science/article/pii/S0211699520301879)
Supplement: mmc2 [file S0211699520301879:mmc2.xlsx]

## Sheet: Hoja1
TEMAS TEORICOS	CADIZ	CORDOBA	GRANADA	MALAGA	SEVILLA	ZARAGOZA	ASTURIAS	BALEARES	CANARIAS-LAGUNA	CANARIAS-LAS PALMAS	CANTABRIA	ALBACETE	SALAMANCA	VALLADOLI	ROVIRA	UAB	GIRONA	LLEIDA	POMPEU	UB	INTERNACIONAL	VIC	BADAJOZ	GALICIA	ALCALA	ALFONSO X	AUTONOMA	CEU	COMPLUTENSE	EUROPEA	VITORIA	REY J CARLOS	MURCIA	CATOLICAMUR	NAVARRA	PAISVASCO	CASTELLON	VALENCIACAT	VALENCIACEU	CASTELLONCEU	MIGUELH	VALENCIA		SUMA TOTAL	DIVIDIDO/42
Recuerdo general	1	1	1		1		1			1	1	1			1						1			1		1	1	1		1	1	1		1	1			1	1	1				22	0.52381
Principales sindromes nefrológicos					1		1	1	1												1					1		1		1		1		1	1		1	1	1	1	1			16	0.380952
Fracaso renal agudo	1	1	1	1	1	1	1	1	1	1	1	1	1	1	1	1	1	1	1	1	1		1	1	1	1	1		1	1	1	1	1	1	1	1	1	1	1	1	1	1		40	0.952381
Enfermedad renal crónica	1	1	1	1	1	1	1	1	1	1	1	1	1	1	1	1	1	1	1	1	1	1	1	1	1	1	1	1	1	1	1	1	1	1	1	1	1	1	1	1	1	1		42	1
Hidroelectroliticos y acido-base		1	1				1	1	1	1		1	1				1			1	1	1		1		1		1	1	1	1	1	1	1	1	1	1	1	1	1	1	1		29	0.690476
Calcio-Fosforo-Magnesio								1									1			1		1													1									5	0.119048
Tratamiento de ERC conservador y sustitutivo	1		1		1	1	1	1			1					1		1	1		1		1	1		1	1	1	1			1	1	1			1				1			22	0.52381
Trasplante renal					1		1				1										1		1			1						1												7	0.166667
Generalidades sobre glomerulonefritis			1		1			1			1		1	1	1		1	1			1	1	1	1			1	1	1	1			1	1			1	1	1	1				23	0.547619
Glomerulonefritis primarias proliferativas	1	1	1	1		1	1	1	1	1	1	1	1	1	1	1		1	1	1			1	1	1	1	1	1	1		1	1	1		1	1	1	1	1	1	1	1		36	0.857143
Glomerulonefritis primarias no proliferativas	1	1	1	1		1	1	1		1	1	1	1	1	1	1		1	1	1			1	1	1	1	1	1	1		1	1	1		1		1	1	1	1	1	1		34	0.809524
Enfermedes sistemicas autoinmunes	1						1	1	1	1	1	1	1		1	1		1	1	1	1		1	1	1	1	1	1		1	1	1	1	1	1	1	1	1	1	1	1	1		33	0.785714
Enfermedades sistemicas hematologícas	1							1		1			1		1	1		1	1	1	1		1	1	1	1	1	1	1				1				1	1	1	1		1		23	0.547619
Nefropatía diabética	1	1		1			1	1	1	1		1	1	1	1	1		1	1				1	1		1	1	1		1		1			1		1	1	1	1	1			27	0.642857
Nefropatía tubulointersticial (aguda/cronica)	1	1		1	1	1		1	1	1	1	1	1	1	1	1	1	1	1	1	1	1	1	1	1	1	1	1	1	1	1	1	1	1	1	1	1	1	1	1	1	1		40	0.952381
Tubulopatías	1	1	1				1						1		1		1	1		1	1	1	1		1	1			1	1	1		1	1	1	1	1	1				1		24	0.571429
Enfermedades hereditarias y/o quisticas	1	1	1	1	1	1	1	1	1	1	1	1	1	1	1	1	1	1	1	1		1	1	1	1	1		1	1	1	1		1	1	1	1	1	1			1	1		37	0.880952
Enf vasculares renales (gran y pequeño vaso)	1		1	1	1	1		1	1	1		1			1	1	1	1	1			1	1	1	1	1		1	1	1		1	1	1	1	1	1	1	1	1				31	0.738095
Rión y embarazo							1			1	1		1					1									1	1				1		1			1	1			1			12	0.285714
Litiasis y obstruccion urinaria							1						1	1														1							1	1	1							7	0.166667
Infecciones urinarias y pielonefritis				1									1										1					1	1				1											6	0.142857
Trombosis y embolismo renal	1																																											1	0.0238095
Envejecimiento renal		1								1														1	1																			4	0.0952381
Hipertension arterial y riñon		1		1				1	1	1	1	1	1	1	1			1		1	1	1	1	1		1		1	1	1	1	1			1			1			1			25	0.595238
Hipertension secundaria							1			1	1	1																																4	0.0952381
Fármacos y riñon									1	1							1					1						1						1	1		1							8	0.190476
Enf asociadas (cirrosis, IC, TB, cardiorenal,neoplasias)													1	1										1		1		1		1		1		1	1		1		1	1				12	0.285714
Otras																								1																				1	0.0238095
TOTAL	14	12	11	10	10	8	16	16	12	17	14	13	17	11	14	11	10	15	11	12	13	10	16	18	11	18	12	20	14	14	11	16	14	15	18	10	19	17	14	14	13	10
SEMINARIOS																																											#DIV/0!
Historia clinica en nefrología			1		1			1					1											1	1		1								1									8	0.190476
Balance de líquidos.Sueroterapia.			1																		1																							2	0.047619
Casos clinicos generales de nefrologia												1																				1												2	0.047619
Hidroelectrolitico y acido-base			1				1	1		1					1											1	1	1							1		1		1	1		1		13	0.309524
Fracaso renal agudo	1		1		1	1	1			1		1	1					1			1				1	1	1	1	1													1		16	0.380952
Enfermedad renal crónica													1			1		1	1		1			1	1							1										1		9	0.214286
Sindrome nefotico y proteinuria	1		1		1					1			1			1		1	1		1				1		1	1	1			1							1	1		1		17	0.404762
ERC/Predialisis/Tto conservador						1																			1	1		1	1		1													6	0.142857
Hemodiális y dialisis peritoneal						1				1								1											1															4	0.0952381
Hipertension arterial						1	1					1				1			1		1						1																	7	0.166667
Trasplante renal					1	1						1				1			1										1							1								7	0.166667
Farmacos en enf renal cronica							1	1				1																																3	0.0714286
Nefropatía tubuloinersticiales																													1															1	0.0238095
TOTAL	2	0	5	0	4	5	4	3	0	4	0	5	4	0	1	4	0	4	4	0	5	0	0	2	5	3	5	4	6	0	1	3	0	0	2	1	1	0	2	2	0	4
